# Supplementary material
Source: PubMed Central journal article supplement (PMC3868364)
Supplement: NIHMS468917-supplement-439_2013_1304_MOESM1_ESM.pdf [file NIHMS468917-supplement-439_2013_1304_MOESM1_ESM.pdf]

**Supplemental Table 1.** VAAST genes with most significant p-values in family 1168 sorted by rank

| <b>Most Significant Shared Variant Genes in Family 1168</b> |             |                |              |
|-------------------------------------------------------------|-------------|----------------|--------------|
| <b>Rank</b>                                                 | <b>Gene</b> | <b>P-value</b> | <b>Score</b> |
| 1                                                           | PDE4DIP     | 1.67E-06       | 512.629      |
| 2                                                           | HEATR1      | 1.67E-06       | 337.392      |
| 3                                                           | HRNR        | 1.67E-06       | 310.495      |
| 4                                                           | OR6N1       | 1.67E-06       | 247.075      |
| 5                                                           | USH2A       | 1.67E-06       | 235.228      |
| 6                                                           | OR2L8       | 1.67E-06       | 234.921      |
| 7                                                           | OR11L1      | 1.67E-06       | 231.181      |
| 8                                                           | OR2M7       | 1.67E-06       | 192.864      |
| 9                                                           | EXO1        | 1.67E-06       | 189.517      |
| 10                                                          | OR2W3       | 1.67E-06       | 184.782      |
| 11                                                          | KIR3DL1     | 1.67E-06       | 178.513      |
| 12                                                          | CR1         | 1.67E-06       | 174.309      |
| 13                                                          | LGALS8      | 1.67E-06       | 173.868      |
| 14                                                          | SPTA1       | 1.67E-06       | 170.285      |
| 15                                                          | NES         | 1.67E-06       | 169.467      |
| 16                                                          | OR14I1      | 1.67E-06       | 167.385      |
| 17                                                          | OR4C3       | 1.67E-06       | 158.420      |
| 18                                                          | KIAA1614    | 1.67E-06       | 151.236      |
| 19                                                          | KIAA1324    | 1.67E-06       | 148.598      |
| 20                                                          | PEAR1       | 1.67E-06       | 145.222      |
| 21                                                          | TCHH        | 1.67E-06       | 135.753      |
| 22                                                          | CENPF       | 1.67E-06       | 121.825      |
| 23                                                          | OR2G2       | 1.67E-06       | 119.260      |
| 24                                                          | FCRL5       | 1.67E-06       | 119.033      |
| 25                                                          | IFI16       | 1.67E-06       | 118.950      |
| 26                                                          | CHIA        | 1.67E-06       | 117.826      |
| 27                                                          | PGLYRP4     | 1.67E-06       | 115.088      |
| 28                                                          | TOR1AIP1    | 1.67E-06       | 113.727      |
| 29                                                          | TLR5        | 1.67E-06       | 113.513      |
| 30                                                          | DTL         | 1.67E-06       | 112.777      |
| 31                                                          | CCDC76      | 1.67E-06       | 112.564      |
| 32                                                          | FAM71A      | 1.67E-06       | 112.360      |
| 33                                                          | OR2T11      | 1.67E-06       | 111.329      |
| 34                                                          | LAMC1       | 1.67E-06       | 111.244      |
| 35                                                          | OR2C3       | 1.67E-06       | 109.797      |
| 36                                                          | CDC27       | 1.67E-06       | 105.246      |
| 37                                                          | OR9G9       | 1.67E-06       | 104.258      |
| 38                                                          | OR2T6       | 1.67E-06       | 98.889       |

|    |                |          |        |
|----|----------------|----------|--------|
| 39 | OR2B11         | 1.67E-06 | 97.796 |
| 40 | THEM5          | 1.67E-06 | 95.040 |
| 41 | IQGAP3         | 1.67E-06 | 93.682 |
| 42 | OR10J1         | 1.67E-06 | 93.464 |
| 43 | ADAR           | 1.67E-06 | 92.914 |
| 44 | MRPL9          | 1.67E-06 | 91.190 |
| 45 | F5             | 1.67E-06 | 91.081 |
| 46 | PTGFRN         | 1.67E-06 | 87.937 |
| 47 | ZNF805         | 1.67E-06 | 83.064 |
| 48 | OR2T12         | 1.67E-06 | 82.076 |
| 49 | IGSF3          | 1.67E-06 | 81.485 |
| 50 | OR14C36        | 1.67E-06 | 79.059 |
| 51 | ADAM15         | 1.67E-06 | 77.869 |
| 52 | AKNAD1         | 1.67E-06 | 77.606 |
| 53 | ASTN1          | 1.67E-06 | 76.817 |
| 54 | KIR2DL4_DUP_01 | 1.67E-06 | 75.509 |
| 55 | CR1L           | 1.67E-06 | 75.217 |
| 56 | ARHGEF11       | 1.67E-06 | 74.387 |
| 57 | MUC6           | 1.67E-06 | 74.285 |
| 58 | ZNF695         | 1.67E-06 | 73.252 |
| 59 | FAM104B_DUP_01 | 1.67E-06 | 72.298 |
| 60 | HYDIN          | 1.67E-06 | 68.669 |
| 61 | EPS8L3         | 1.67E-06 | 65.993 |
| 62 | CTBP2          | 1.67E-06 | 60.405 |
| 63 | GPR37L1        | 1.67E-06 | 58.488 |
| 64 | F13B           | 1.67E-06 | 57.598 |
| 65 | RRNAD1         | 1.67E-06 | 57.520 |
| 66 | MYBPHL         | 1.67E-06 | 57.296 |
| 67 | BCL2L15        | 1.67E-06 | 57.296 |
| 68 | TMEM81         | 1.67E-06 | 57.090 |
| 69 | PRODH          | 1.67E-06 | 57.090 |
| 70 | CR2            | 1.67E-06 | 56.757 |
| 71 | CSF1           | 1.67E-06 | 56.540 |
| 72 | PRG4           | 1.67E-06 | 56.537 |
| 73 | ASPM           | 1.67E-06 | 56.324 |
| 74 | ACP6           | 1.67E-06 | 56.072 |
| 75 | DSTYK          | 1.67E-06 | 55.948 |
| 76 | ITPKB          | 1.67E-06 | 55.701 |
| 77 | XKR3           | 1.67E-06 | 55.660 |
| 78 | PTPN22         | 1.67E-06 | 55.650 |
| 79 | TRIM33         | 1.67E-06 | 55.627 |
| 80 | OR14A16        | 1.67E-06 | 55.627 |
| 81 | MIA3           | 1.67E-06 | 55.609 |

|     |          |          |        |
|-----|----------|----------|--------|
| 82  | C1orf111 | 1.67E-06 | 55.430 |
| 83  | CDC42BPA | 1.67E-06 | 55.430 |
| 84  | CEP350   | 1.67E-06 | 55.377 |
| 85  | ANKRD35  | 1.67E-06 | 55.377 |
| 86  | PPP1R15B | 1.67E-06 | 55.357 |
| 87  | AHCTF1   | 1.67E-06 | 55.357 |
| 88  | FAM63A   | 1.67E-06 | 55.252 |
| 89  | C1orf116 | 1.67E-06 | 54.916 |
| 90  | C1orf204 | 1.67E-06 | 54.758 |
| 91  | RGS16    | 1.67E-06 | 54.659 |
| 92  | LYPLAL1  | 1.67E-06 | 54.637 |
| 93  | OR2T27   | 1.67E-06 | 54.609 |
| 94  | CD101    | 1.67E-06 | 54.464 |
| 95  | PRSS38   | 1.67E-06 | 54.464 |
| 96  | SYT11    | 1.67E-06 | 54.420 |
| 97  | S100A7   | 1.67E-06 | 54.321 |
| 98  | RXFP4    | 1.67E-06 | 54.095 |
| 99  | CNST     | 1.67E-06 | 54.095 |
| 100 | EPRS     | 1.67E-06 | 53.814 |
| 101 | FNDC7    | 1.67E-06 | 52.918 |
| 102 | TSHB     | 1.67E-06 | 52.518 |
| 103 | ASH1L    | 1.67E-06 | 52.518 |
| 104 | PRSS3    | 1.67E-06 | 52.518 |
| 105 | DBT      | 1.67E-06 | 52.485 |
| 106 | PPM1J    | 1.67E-06 | 52.355 |
| 107 | PM20D1   | 1.67E-06 | 52.296 |
| 108 | APOBEC4  | 1.67E-06 | 50.179 |
| 109 | SETD8    | 1.67E-06 | 50.131 |
| 110 | HMCN1    | 1.67E-06 | 49.473 |
| 111 | COL11A1  | 1.67E-06 | 49.220 |
| 112 | RNASEL   | 1.67E-06 | 48.934 |
| 113 | BGLAP    | 1.67E-06 | 47.003 |
| 114 | LRRC71   | 1.67E-06 | 46.590 |
| 115 | OR10T2   | 1.67E-06 | 45.585 |
| 116 | ITLN1    | 1.67E-06 | 41.033 |
| 117 | OR6K3    | 1.67E-06 | 40.721 |
| 118 | FMN2     | 1.67E-06 | 40.220 |
| 119 | ITLN2    | 1.67E-06 | 40.220 |
| 120 | SMYD2    | 1.67E-06 | 39.954 |
| 121 | URB2     | 1.67E-06 | 39.747 |
| 122 | ST7L     | 1.67E-06 | 39.712 |
| 123 | EDEM3    | 1.67E-06 | 39.623 |
| 124 | LEFTY1   | 1.67E-06 | 38.831 |

|     |               |          |        |
|-----|---------------|----------|--------|
| 125 | OR10R2        | 1.67E-06 | 38.437 |
| 126 | CHI3L1        | 1.67E-06 | 38.299 |
| 127 | GPRIN2        | 1.67E-06 | 38.299 |
| 128 | TTF2          | 1.67E-06 | 38.230 |
| 129 | ZNF845        | 1.67E-06 | 37.999 |
| 130 | CHD1L         | 1.67E-06 | 37.836 |
| 131 | SLC6A17       | 1.67E-06 | 37.756 |
| 132 | OR10Z1        | 1.67E-06 | 37.738 |
| 133 | POTEF         | 1.67E-06 | 37.557 |
| 134 | SEMA6C        | 1.67E-06 | 37.550 |
| 135 | HSD3B1        | 1.67E-06 | 37.515 |
| 136 | AGT           | 1.67E-06 | 37.484 |
| 137 | FCGR2A        | 1.67E-06 | 37.280 |
| 138 | SEC16B        | 1.67E-06 | 37.280 |
| 139 | SHISA4_DUP_01 | 1.67E-06 | 37.258 |
| 140 | ARHGAP30      | 1.67E-06 | 37.231 |
| 141 | AXDND1        | 1.67E-06 | 37.093 |
| 142 | SLAMF9        | 1.67E-06 | 37.093 |
| 143 | NSL1          | 1.67E-06 | 37.086 |
| 144 | MTMR11        | 1.67E-06 | 37.086 |
| 145 | ATF6          | 1.67E-06 | 37.086 |
| 146 | ACBD3         | 1.67E-06 | 36.942 |
| 147 | SLC16A1       | 1.67E-06 | 36.436 |
| 148 | SCYL3         | 1.67E-06 | 36.003 |
| 149 | C1orf105      | 1.67E-06 | 35.792 |
| 150 | LBR           | 1.67E-06 | 35.792 |
| 151 | HBXIP         | 1.67E-06 | 35.792 |
| 152 | PLA2G4A       | 1.67E-06 | 35.711 |
| 153 | LGR6          | 1.67E-06 | 35.540 |
| 154 | MOSC1         | 1.67E-06 | 35.140 |
| 155 | GSTM3         | 1.67E-06 | 34.977 |
| 156 | PROK1         | 1.67E-06 | 34.977 |
| 157 | PLEKHA6       | 1.67E-06 | 34.977 |
| 158 | OR13G1        | 1.67E-06 | 34.918 |
| 159 | OR2G3         | 1.67E-06 | 34.918 |
| 160 | VAV3          | 1.67E-06 | 34.675 |
| 161 | MTX1          | 1.67E-06 | 34.675 |
| 162 | EFNA1         | 1.67E-06 | 27.648 |
| 163 | ATP1A4        | 1.67E-06 | 26.503 |
| 164 | DARC          | 1.67E-06 | 26.503 |
| 165 | PBXIP1        | 1.67E-06 | 26.503 |
| 166 | SCCPDH        | 1.67E-06 | 26.115 |
| 167 | SELP          | 1.67E-06 | 25.311 |

|     |                |          |        |
|-----|----------------|----------|--------|
| 168 | DENND2C        | 1.67E-06 | 25.210 |
| 169 | LIPK           | 1.67E-06 | 24.941 |
| 170 | IBA57          | 1.67E-06 | 24.785 |
| 171 | FLG2           | 1.67E-06 | 24.552 |
| 172 | CELSR2         | 1.67E-06 | 24.339 |
| 173 | UAP1           | 1.67E-06 | 24.339 |
| 174 | HDGF           | 1.67E-06 | 24.289 |
| 175 | C1orf124       | 1.67E-06 | 24.289 |
| 176 | ADAMTSL4       | 1.67E-06 | 24.233 |
| 177 | CLDN16         | 1.67E-06 | 24.233 |
| 178 | CLCC1          | 1.67E-06 | 24.005 |
| 179 | TCEB3CL_DUP_02 | 1.67E-06 | 23.996 |
| 180 | RPTN           | 1.67E-06 | 23.831 |
| 181 | PLXNA2         | 1.67E-06 | 23.831 |
| 182 | C4BPA          | 1.67E-06 | 23.642 |
| 183 | CAPN2          | 1.67E-06 | 23.625 |
| 184 | EDARADD        | 1.67E-06 | 23.607 |
| 185 | CEP170         | 1.67E-06 | 23.540 |
| 186 | C1orf129       | 1.67E-06 | 23.373 |
| 187 | LHX4           | 1.67E-06 | 23.373 |
| 188 | OR2T4          | 1.67E-06 | 23.293 |
| 189 | PIGC           | 1.67E-06 | 23.293 |
| 190 | BCL9           | 1.67E-06 | 23.293 |
| 191 | PCMTD1         | 1.67E-06 | 23.131 |
| 192 | OR2T1          | 1.67E-06 | 22.674 |
| 193 | METTTL13       | 1.67E-06 | 22.479 |
| 194 | LY9            | 1.67E-06 | 22.479 |
| 195 | KCNJ12         | 1.67E-06 | 22.435 |
| 196 | SIPA1L2        | 1.67E-06 | 22.328 |
| 197 | CBWD6          | 1.67E-06 | 21.831 |
| 198 | CD1E           | 1.67E-06 | 21.396 |
| 199 | ADAMTS4        | 1.67E-06 | 21.396 |
| 200 | KDM4DL         | 1.67E-06 | 21.396 |
| 201 | PRSS1          | 1.67E-06 | 21.186 |
| 202 | ADCY10         | 1.67E-06 | 20.311 |

**Supplemental Table 2.** VAAST genes with most significant p-values in family 1281 sorted by rank

| <b>Most Significant Shared Variant Genes in Family 1281</b> |             |                |              |
|-------------------------------------------------------------|-------------|----------------|--------------|
| <b>Rank</b>                                                 | <b>Gene</b> | <b>P-value</b> | <b>Score</b> |
| 1                                                           | HRNR        | 1.67E-06       | 537.335      |
| 2                                                           | PDE4DIP     | 1.67E-06       | 529.390      |
| 3                                                           | USH2A       | 1.67E-06       | 297.292      |
| 4                                                           | OR2L8       | 1.67E-06       | 234.921      |
| 5                                                           | SPTA1       | 1.67E-06       | 234.171      |
| 6                                                           | OR11L1      | 1.67E-06       | 231.181      |
| 7                                                           | OR6N1       | 1.67E-06       | 228.362      |
| 8                                                           | OR2W3       | 1.67E-06       | 215.566      |
| 9                                                           | IFI16       | 1.67E-06       | 190.834      |
| 10                                                          | EXO1        | 1.67E-06       | 177.373      |
| 11                                                          | FCRL5       | 1.67E-06       | 171.167      |
| 12                                                          | HEATR1      | 1.67E-06       | 171.124      |
| 13                                                          | KIAA1324    | 1.67E-06       | 168.173      |
| 14                                                          | OVGP1       | 1.67E-06       | 157.966      |
| 15                                                          | KIR3DL1     | 1.67E-06       | 146.413      |
| 16                                                          | IGSF3       | 1.67E-06       | 134.528      |
| 17                                                          | OR10R2      | 1.67E-06       | 134.258      |
| 18                                                          | LGR6        | 1.67E-06       | 133.677      |
| 19                                                          | OR14I1      | 1.67E-06       | 131.007      |
| 20                                                          | ASPM        | 1.67E-06       | 130.247      |
| 21                                                          | OR2C3       | 1.67E-06       | 130.028      |
| 22                                                          | CHIA        | 1.67E-06       | 126.557      |
| 23                                                          | OR13G1      | 1.67E-06       | 123.546      |
| 24                                                          | OR10X1      | 1.67E-06       | 120.470      |
| 25                                                          | PGLYRP4     | 1.67E-06       | 115.088      |
| 26                                                          | ECM1        | 1.67E-06       | 114.953      |
| 27                                                          | TCHH        | 1.67E-06       | 114.525      |
| 28                                                          | DUSP27      | 1.67E-06       | 114.130      |
| 29                                                          | THEM5       | 1.67E-06       | 113.804      |
| 30                                                          | TLR5        | 1.67E-06       | 113.513      |
| 31                                                          | COL11A1     | 1.67E-06       | 113.190      |
| 32                                                          | KIAA1614    | 1.67E-06       | 113.125      |
| 33                                                          | DTL         | 1.67E-06       | 112.777      |
| 34                                                          | FAM71A      | 1.67E-06       | 112.360      |
| 35                                                          | ASTN1       | 1.67E-06       | 111.574      |
| 36                                                          | OR2T11      | 1.67E-06       | 111.329      |
| 37                                                          | TNR         | 1.67E-06       | 107.386      |
| 38                                                          | IQGAP3      | 1.67E-06       | 105.922      |

|    |                |          |         |
|----|----------------|----------|---------|
| 39 | CDC27          | 1.67E-06 | 105.246 |
| 40 | OR2G2          | 1.67E-06 | 104.183 |
| 41 | CENPF          | 1.67E-06 | 103.834 |
| 42 | OR4C3          | 1.67E-06 | 102.501 |
| 43 | OR2M7          | 1.67E-06 | 102.453 |
| 44 | HMCN1          | 1.67E-06 | 101.611 |
| 45 | DNAH14         | 1.67E-06 | 100.871 |
| 46 | MUC6           | 1.67E-06 | 100.824 |
| 47 | VAV3           | 1.67E-06 | 98.540  |
| 48 | CR1L           | 1.67E-06 | 97.057  |
| 49 | CAPN9          | 1.67E-06 | 94.835  |
| 50 | CHD1L          | 1.67E-06 | 94.431  |
| 51 | OR10J1         | 1.67E-06 | 93.464  |
| 52 | ITPKB          | 1.67E-06 | 89.898  |
| 53 | KCNJ12         | 1.67E-06 | 87.503  |
| 54 | CSF1           | 1.67E-06 | 80.732  |
| 55 | TOR1AIP1       | 1.67E-06 | 78.971  |
| 56 | KIR3DL2        | 1.67E-06 | 78.295  |
| 57 | OR9G9          | 1.67E-06 | 78.170  |
| 58 | RNASEL         | 1.67E-06 | 78.147  |
| 59 | LGALS8         | 1.67E-06 | 77.914  |
| 60 | GPRIN2         | 1.67E-06 | 77.850  |
| 61 | CD101          | 1.67E-06 | 77.697  |
| 62 | FAM177B        | 1.67E-06 | 77.626  |
| 63 | ADAR           | 1.67E-06 | 76.922  |
| 64 | CAPN2          | 1.67E-06 | 76.667  |
| 65 | CFH            | 1.67E-06 | 76.525  |
| 66 | LAMC1          | 1.67E-06 | 76.488  |
| 67 | CDC42BPA       | 1.67E-06 | 75.028  |
| 68 | OR10T2         | 1.67E-06 | 74.799  |
| 69 | C1orf68        | 1.67E-06 | 74.518  |
| 70 | NSL1           | 1.67E-06 | 74.004  |
| 71 | MAGEC1         | 1.67E-06 | 72.628  |
| 72 | FAM104B_DUP_01 | 1.67E-06 | 72.298  |
| 73 | PTGFRN         | 1.67E-06 | 71.945  |
| 74 | CR1            | 1.67E-06 | 71.815  |
| 75 | SWT1           | 1.67E-06 | 69.177  |
| 76 | HYDIN          | 1.67E-06 | 68.669  |
| 77 | TNN            | 1.67E-06 | 63.405  |
| 78 | FNDC7          | 1.67E-06 | 63.335  |
| 79 | ATF6           | 1.67E-06 | 62.191  |
| 80 | KIR3DL3        | 1.67E-06 | 61.579  |
| 81 | PM20D1         | 1.67E-06 | 60.220  |

|     |          |          |        |
|-----|----------|----------|--------|
| 82  | EFNA1    | 1.67E-06 | 59.633 |
| 83  | ATP1A4   | 1.67E-06 | 58.488 |
| 84  | GPR37L1  | 1.67E-06 | 58.488 |
| 85  | LCE5A    | 1.67E-06 | 57.652 |
| 86  | F13B     | 1.67E-06 | 57.598 |
| 87  | RRNAD1   | 1.67E-06 | 57.520 |
| 88  | SMYD2    | 1.67E-06 | 57.332 |
| 89  | MYBPHL   | 1.67E-06 | 57.296 |
| 90  | BCL2L15  | 1.67E-06 | 57.296 |
| 91  | PRODH    | 1.67E-06 | 57.090 |
| 92  | EPS8L3   | 1.67E-06 | 56.926 |
| 93  | PRG4     | 1.67E-06 | 56.537 |
| 94  | ADAMTSL4 | 1.67E-06 | 56.218 |
| 95  | FLVCR1   | 1.67E-06 | 56.183 |
| 96  | ACP6     | 1.67E-06 | 56.072 |
| 97  | OR2B11   | 1.67E-06 | 56.072 |
| 98  | OR14C36  | 1.67E-06 | 55.663 |
| 99  | C1orf227 | 1.67E-06 | 55.627 |
| 100 | TRIM33   | 1.67E-06 | 55.627 |
| 101 | OR14A16  | 1.67E-06 | 55.627 |
| 102 | TTF2     | 1.67E-06 | 55.609 |
| 103 | MIA3     | 1.67E-06 | 55.609 |
| 104 | C1orf111 | 1.67E-06 | 55.430 |
| 105 | JMJD4    | 1.67E-06 | 55.430 |
| 106 | SH2D2A   | 1.67E-06 | 55.357 |
| 107 | PPP1R15B | 1.67E-06 | 55.357 |
| 108 | ADAM15   | 1.67E-06 | 55.347 |
| 109 | FAM63A   | 1.67E-06 | 55.252 |
| 110 | SEMA6C   | 1.67E-06 | 54.928 |
| 111 | PEAR1    | 1.67E-06 | 54.916 |
| 112 | C1orf116 | 1.67E-06 | 54.916 |
| 113 | APOA1BP  | 1.67E-06 | 54.769 |
| 114 | DIEXF    | 1.67E-06 | 54.758 |
| 115 | C1orf204 | 1.67E-06 | 54.758 |
| 116 | SEC16B   | 1.67E-06 | 54.659 |
| 117 | UBQLN4   | 1.67E-06 | 54.637 |
| 118 | LYPLAL1  | 1.67E-06 | 54.637 |
| 119 | OR2T27   | 1.67E-06 | 54.609 |
| 120 | SLAMF9   | 1.67E-06 | 54.472 |
| 121 | PRSS38   | 1.67E-06 | 54.464 |
| 122 | SYT11    | 1.67E-06 | 54.420 |
| 123 | S100A7   | 1.67E-06 | 54.321 |
| 124 | RXFP4    | 1.67E-06 | 54.095 |

|     |           |          |        |
|-----|-----------|----------|--------|
| 125 | CNST      | 1.67E-06 | 54.095 |
| 126 | ZNF805    | 1.67E-06 | 53.851 |
| 127 | SLC16A1   | 1.67E-06 | 53.814 |
| 128 | EPRS      | 1.67E-06 | 53.814 |
| 129 | SCYL3     | 1.67E-06 | 53.381 |
| 130 | F5        | 1.67E-06 | 53.381 |
| 131 | LBR       | 1.67E-06 | 53.170 |
| 132 | PLA2G4A   | 1.67E-06 | 53.090 |
| 133 | ERO1LB    | 1.67E-06 | 52.578 |
| 134 | TSHB      | 1.67E-06 | 52.518 |
| 135 | ASH1L     | 1.67E-06 | 52.518 |
| 136 | PRSS3     | 1.67E-06 | 52.518 |
| 137 | DBT       | 1.67E-06 | 52.485 |
| 138 | PPM1J     | 1.67E-06 | 52.355 |
| 139 | AQP10     | 1.67E-06 | 52.047 |
| 140 | BCLAF1    | 1.67E-06 | 50.521 |
| 141 | SELP      | 1.67E-06 | 50.255 |
| 142 | APOBEC4   | 1.67E-06 | 50.179 |
| 143 | SETD8     | 1.67E-06 | 50.131 |
| 144 | POTED     | 1.67E-06 | 49.265 |
| 145 | CEP89     | 1.67E-06 | 47.605 |
| 146 | NES       | 1.67E-06 | 46.659 |
| 147 | SAA2-SAA4 | 1.67E-06 | 46.378 |
| 148 | C1orf85   | 1.67E-06 | 45.604 |
| 149 | SPRR1A    | 1.67E-06 | 45.300 |
| 150 | ARHGEF11  | 1.67E-06 | 45.174 |
| 151 | PDE10A    | 1.67E-06 | 44.201 |
| 152 | ZNF695    | 1.67E-06 | 44.038 |
| 153 | FCRLB     | 1.67E-06 | 41.110 |
| 154 | OR6K3     | 1.67E-06 | 40.721 |
| 155 | KIR2DL1   | 1.67E-06 | 40.142 |
| 156 | DENND2C   | 1.67E-06 | 39.817 |
| 157 | URB2      | 1.67E-06 | 39.747 |
| 158 | TMEM81    | 1.67E-06 | 39.712 |
| 159 | NUF2      | 1.67E-06 | 39.686 |
| 160 | C1orf162  | 1.67E-06 | 39.392 |
| 161 | PIGR      | 1.67E-06 | 39.392 |
| 162 | CR2       | 1.67E-06 | 39.379 |
| 163 | IL19      | 1.67E-06 | 39.162 |
| 164 | KPRP      | 1.67E-06 | 39.159 |
| 165 | CLDN16    | 1.67E-06 | 38.839 |
| 166 | OR2AK2    | 1.67E-06 | 38.694 |
| 167 | DSTYK     | 1.67E-06 | 38.569 |

|     |               |          |        |
|-----|---------------|----------|--------|
| 168 | TBX15         | 1.67E-06 | 38.282 |
| 169 | PTPN22        | 1.67E-06 | 38.272 |
| 170 | C4BPA         | 1.67E-06 | 38.248 |
| 171 | DDX20         | 1.67E-06 | 38.248 |
| 172 | CEP350        | 1.67E-06 | 37.999 |
| 173 | ANKRD35       | 1.67E-06 | 37.999 |
| 174 | LHX4          | 1.67E-06 | 37.979 |
| 175 | FAM46C        | 1.67E-06 | 37.537 |
| 176 | TRAF3IP3      | 1.67E-06 | 37.380 |
| 177 | AXDND1        | 1.67E-06 | 37.380 |
| 178 | RGS16         | 1.67E-06 | 37.280 |
| 179 | SHISA4_DUP_01 | 1.67E-06 | 37.258 |
| 180 | METTL13       | 1.67E-06 | 37.086 |
| 181 | LY9           | 1.67E-06 | 37.086 |
| 182 | SDCCAG8       | 1.67E-06 | 36.942 |
| 183 | CD1E          | 1.67E-06 | 36.003 |
| 184 | BGLAP         | 1.67E-06 | 36.003 |
| 185 | HBXIP         | 1.67E-06 | 35.792 |
| 186 | MOSC1         | 1.67E-06 | 35.140 |
| 187 | LCE1E         | 1.67E-06 | 35.107 |
| 188 | PLEKHA6       | 1.67E-06 | 34.977 |
| 189 | TARBP1        | 1.67E-06 | 34.968 |
| 190 | ADCY10        | 1.67E-06 | 34.918 |
| 191 | BBS9          | 1.67E-06 | 32.714 |
| 192 | CHI3L2        | 1.67E-06 | 27.068 |
| 193 | PAPPA2        | 1.67E-06 | 27.068 |
| 194 | CACNA1S       | 1.67E-06 | 26.702 |
| 195 | KMO           | 1.67E-06 | 26.702 |
| 196 | DCST1         | 1.67E-06 | 26.702 |
| 197 | PIP           | 1.67E-06 | 26.674 |
| 198 | FMO3          | 1.67E-06 | 26.179 |
| 199 | BCAN          | 1.67E-06 | 26.179 |
| 200 | OR2T12        | 1.67E-06 | 26.135 |
| 201 | KIAA1671      | 1.67E-06 | 26.135 |
| 202 | VSIG4         | 1.67E-06 | 26.115 |
| 203 | FMN2          | 1.67E-06 | 25.613 |
| 204 | FRG1          | 1.67E-06 | 25.348 |
| 205 | NUDT22        | 1.67E-06 | 25.221 |
| 206 | FCRL4         | 1.67E-06 | 25.105 |
| 207 | SHMT2_DUP_01  | 1.67E-06 | 25.105 |
| 208 | YIF1B         | 1.67E-06 | 25.055 |
| 209 | TPTE          | 1.67E-06 | 25.055 |
| 210 | C1orf88       | 1.67E-06 | 24.729 |

|     |                |          |        |
|-----|----------------|----------|--------|
| 211 | ZNF337         | 1.67E-06 | 24.688 |
| 212 | TDRD5          | 1.67E-06 | 24.531 |
| 213 | C1orf110       | 1.67E-06 | 24.531 |
| 214 | IL24           | 1.67E-06 | 24.339 |
| 215 | C1orf129       | 1.67E-06 | 24.339 |
| 216 | TEDDM1         | 1.67E-06 | 24.339 |
| 217 | COL4A5         | 1.67E-06 | 24.289 |
| 218 | INSRR          | 1.67E-06 | 24.289 |
| 219 | C1orf124       | 1.67E-06 | 24.289 |
| 220 | KIR2DL4_DUP_01 | 1.67E-06 | 24.289 |
| 221 | TMEM79_DUP_01  | 1.67E-06 | 24.087 |
| 222 | EFNA3          | 1.67E-06 | 24.087 |
| 223 | HHIPL2         | 1.67E-06 | 24.028 |
| 224 | KIF14          | 1.67E-06 | 24.005 |
| 225 | CLCC1          | 1.67E-06 | 24.005 |
| 226 | TCEB3CL_DUP_02 | 1.67E-06 | 23.996 |
| 227 | DISC1          | 1.67E-06 | 23.701 |
| 228 | NAIF1          | 1.67E-06 | 23.701 |
| 229 | OR2M2          | 1.67E-06 | 23.693 |
| 230 | CGB1           | 1.67E-06 | 23.693 |
| 231 | EDARADD        | 1.67E-06 | 23.607 |
| 232 | SLAMF1         | 1.67E-06 | 23.577 |
| 233 | NOTCH2NL       | 1.67E-06 | 23.540 |
| 234 | AHCTF1         | 1.67E-06 | 23.373 |
| 235 | CREB3L4        | 1.67E-06 | 23.293 |
| 236 | NLRP3          | 1.67E-06 | 23.193 |
| 237 | OR10Z1         | 1.67E-06 | 23.131 |
| 238 | PCMTD1         | 1.67E-06 | 23.131 |
| 239 | METTL11B       | 1.67E-06 | 22.931 |
| 240 | HSD3B1         | 1.67E-06 | 22.908 |
| 241 | AGT            | 1.67E-06 | 22.877 |
| 242 | CD244          | 1.67E-06 | 22.798 |
| 243 | MFSD4          | 1.67E-06 | 22.798 |
| 244 | MR1            | 1.67E-06 | 22.674 |
| 245 | FCGR2A         | 1.67E-06 | 22.674 |
| 246 | FCRL2          | 1.67E-06 | 22.628 |
| 247 | ARHGAP30       | 1.67E-06 | 22.624 |
| 248 | SPRR3          | 1.67E-06 | 22.624 |
| 249 | LAMC2          | 1.67E-06 | 22.587 |
| 250 | RASA2          | 1.67E-06 | 22.587 |
| 251 | CFHR4          | 1.67E-06 | 22.491 |
| 252 | MTMR11         | 1.67E-06 | 22.479 |
| 253 | CRTC2          | 1.67E-06 | 22.479 |

|     |         |          |        |
|-----|---------|----------|--------|
| 254 | RTBDN   | 1.67E-06 | 22.362 |
| 255 | ACBD3   | 1.67E-06 | 22.336 |
| 256 | METTL18 | 1.67E-06 | 22.336 |
| 257 | ATP8B2  | 1.67E-06 | 22.016 |
| 258 | NCF2    | 1.67E-06 | 22.016 |
| 259 | CBWD6   | 1.67E-06 | 21.831 |
| 260 | NAP1L2  | 1.67E-06 | 21.829 |
| 261 | KISS1   | 1.67E-06 | 21.396 |
| 262 | AKNAD1  | 1.67E-06 | 21.186 |
| 263 | AMY2B   | 1.67E-06 | 20.934 |
| 264 | PARP1   | 1.67E-06 | 20.934 |
| 265 | BEND3   | 1.67E-06 | 20.934 |
| 266 | IVL     | 1.67E-06 | 20.533 |
| 267 | CASQ2   | 1.67E-06 | 20.533 |
| 268 | OR6Y1   | 1.67E-06 | 20.370 |
| 269 | GSTM3   | 1.67E-06 | 20.370 |
| 270 | NUP210L | 1.67E-06 | 20.370 |
| 271 | ILDR2   | 1.67E-06 | 20.370 |
| 272 | XPR1    | 1.67E-06 | 20.311 |
| 273 | ABL2    | 1.67E-06 | 20.068 |
| 274 | NUP98   | 1.67E-06 | 19.555 |
| 275 | NKRF    | 1.67E-06 | 18.199 |

**Supplemental Table 3.** KEGG pathways with more than three genes from the list of the most significant p-value genes for family 1168

| <b>KEGG Pathways Top P-value Genes Family 1168</b>       |
|----------------------------------------------------------|
| hsa04740 Olfactory transduction (25)                     |
| hsa01100 Metabolic pathways (8)                          |
| hsa04610 Complement and coagulation cascades (5)         |
| hsa04640 Hematopoietic cell lineage (4)                  |
| hsa04510 Focal adhesion (4)                              |
| hsa04972 Pancreatic secretion (4)                        |
| hsa05164 Influenza A (4)                                 |
| hsa04974 Protein digestion and absorption (4)            |
| hsa04080 Neuroactive ligand-receptor interaction (3)     |
| hsa04141 Protein processing in endoplasmic reticulum (3) |
| hsa05144 Malaria (3)                                     |
| hsa00520 Amino sugar and nucleotide sugar metabolism (3) |
| hsa04666 Fc gamma R-mediated phagocytosis (3)            |
| hsa04360 Axon guidance (3)                               |

**Supplemental Table 4.** KEGG pathways that contained more than three genes from the most significant p-value genes for family 1281

| <b>KEGG Pathways Top P-value Genes Family 1281</b>       |
|----------------------------------------------------------|
| hsa04740 Olfactory transduction (20)                     |
| hsa04510 Focal adhesion (6)                              |
| hsa01100 Metabolic pathways (5)                          |
| hsa04141 Protein processing in endoplasmic reticulum (4) |
| hsa04610 Complement and coagulation cascades (4)         |
| hsa04512 ECM-receptor interaction (4)                    |
| hsa04972 Pancreatic secretion (3)                        |
| hsa04650 Natural killer cell mediated cytotoxicity (3)   |
| hsa05164 Influenza A (3)                                 |
| hsa04612 Antigen processing and presentation (3)         |
| hsa04974 Protein digestion and absorption (3)            |

**Supplemental Table 5.** All novel missense variants in our six other exomes in the six complement and coagulation cascade genes identified by VAAST (for the PolyPhen-2 prediction the HumDiv algorithm was used).

| <b>Individual</b> | <b>Gene</b> | <b>Variant</b> | <b>PolyPhen-2</b> |
|-------------------|-------------|----------------|-------------------|
| Family 150        | <i>F5</i>   | GLU1390GLN     | Benign            |
| Family 150        | <i>F5</i>   | LEU1370PHE     | Benign            |
| Family 150        | <i>F5</i>   | PRO1361LEU     | Benign            |
| Family 150        | <i>F5</i>   | LEU1357ILE     | Benign            |
| Family 1165       | <i>F5</i>   | LEU1370PHE     | Benign            |
| Family 1165       | <i>F5</i>   | PRO1361LEU     | Benign            |
| Family 1165       | <i>F5</i>   | LEU1357ILE     | Benign            |
| Family 1165       | <i>F5</i>   | PHE1334LEU     | Benign            |
| Family 1165       | <i>F5</i>   | ARG1220THR     | Benign            |
| Family 14w        | <i>CFH</i>  | THR956MET      | Probably Damaging |

**Supplemental Table 6.** Complete unadjusted and adjusted additive logistic regression association results for Finnish mothers' Illumina arrays sorted by adjusted p-value. The gene listed is that in which the SNP is located and in parentheses is the VAAST gene the SNP was selected to interrogate within the 10 kb 5' and 3' buffer.

| CHR | SNP            | BP        | GENE  | MINOR ALLELE | MAJOR ALLELE | ADJ P-VALUE | ADJ OR | UNADJ P-VALUE | UNADJ OR |
|-----|----------------|-----------|-------|--------------|--------------|-------------|--------|---------------|----------|
| 1   | rs6691117      | 207782931 | CR1   | G            | A            | 1.07E-04    | 1.732  | 6.93E-05      | 1.741    |
| 1   | EXM133911      | 197031021 | F13B  | C            | T            | 0.0213      | 0.5327 | 0.04428       | 0.5864   |
| 1   | EXM-RS12034383 | 207803595 | CR1   | G            | A            | 0.0307      | 1.31   | 0.02107       | 1.326    |
| 1   | EXM-RS6656401  | 207692049 | CR1   | A            | G            | 0.0504      | 0.7326 | 0.05833       | 0.7454   |
| 1   | EXM144910      | 207782769 | CR1   | A            | G            | 0.0793      | 1.477  | 0.1053        | 1.423    |
| 1   | EXM-RS3818361  | 207784968 | CR1   | T            | C            | 0.0927      | 0.7726 | 0.09383       | 0.7776   |
| 1   | EXM-RS6701713  | 207786289 | CR1   | A            | G            | 0.0927      | 0.7726 | 0.09383       | 0.7776   |
| 1   | EXM144976      | 207795320 | CR1   | A            | G            | 0.1011      | 0.7782 | 0.104         | 0.784    |
| 1   | EXM-RS3813948  | 207269858 | C4BPA | G            | A            | 0.1553      | 0.673  | 0.165         | 0.6842   |
| 1   | EXM-RS6677604  | 196686918 | CFH   | A            | G            | 0.1601      | 0.752  | 0.1991        | 0.7769   |
| 1   | EXM144922      | 207782916 | CR1   | A            | T            | 0.1796      | 0.493  | 0.127         | 0.4497   |
| 1   | EXM144743      | 207653395 | CR2   | C            | A            | 0.1905      | 0.7905 | 0.1542        | 0.7775   |
| 1   | EXM-RS1061170  | 196659237 | CFH   | C            | T            | 0.1964      | 0.8492 | 0.1775        | 0.8459   |
| 1   | EXM144486      | 207304980 | C4BPA | C            | G            | 0.2161      | 2.305  | 0.3081        | 1.987    |
| 1   | EXM121798      | 169510139 | F5    | A            | G            | 0.2205      | 0.7313 | 0.1913        | 0.7219   |
| 1   | EXM121818      | 169510475 | F5    | T            | G            | 0.2523      | 0.8353 | 0.3945        | 0.878    |
| 1   | EXM121977      | 169521853 | F5    | G            | A            | 0.2732      | 0.7969 | 0.5509        | 0.8878   |
| 1   | EXM121943      | 169513583 | F5    | T            | G            | 0.3048      | 0.8082 | 0.6067        | 0.9022   |
| 1   | EXM2250216     | 169513583 | F5    | T            | G            | 0.3048      | 0.8082 | 0.6067        | 0.9022   |
| 1   | EXM-RS1329424  | 196646176 | CFH   | A            | C            | 0.3288      | 0.8869 | 0.2994        | 0.8824   |
| 1   | EXM133342      | 196642233 | CFH   | A            | G            | 0.3511      | 1.135  | 0.2702        | 1.158    |
| 1   | EXM133469      | 196709816 | CFH   | T            | G            | 0.3593      | 3.091  | 0.4045        | 2.783    |
| 1   | EXM144433      | 207286381 | C4BPA | A            | C            | 0.4025      | 1.58   | 0.5381        | 1.396    |
| 1   | EXM133467      | 196709774 | CFH   | T            | G            | 0.4383      | 1.142  | 0.6694        | 1.074    |
| 1   | EXM122025      | 169541513 | F5    | G            | C            | 0.4563      | 1.328  | 0.5909        | 1.224    |
| 1   | EXM121797      | 169510118 | F5    | A            | G            | 0.4583      | 0.7704 | 0.4232        | 0.7584   |
| 1   | EXM122022      | 169529974 | F5    | A            | G            | 0.4843      | 0.5536 | 0.4769        | 0.5498   |
| 1   | EXM-RS380390   | 196701051 | CFH   | C            | G            | 0.4857      | 0.9182 | 0.4585        | 0.9149   |
| 1   | EXM144908      | 207782707 | CR1   | G            | A            | 0.5277      | 1.139  | 0.4767        | 1.155    |
| 1   | EXM144887      | 207760772 | CR1   | G            | A            | 0.5394      | 1.304  | 0.5605        | 1.282    |
| 1   | EXM121681      | 169483561 | F5    | C            | T            | 0.5635      | 0.877  | 0.9626        | 1.01     |
| 1   | EXM122058      | 169563951 | F5    | G            | T            | 0.5974      | 0.9059 | 0.5445        | 0.8951   |
| 1   | EXM121903      | 169511878 | F5    | G            | T            | 0.5975      | 0.8857 | 0.9166        | 1.023    |
| 1   | EXM-RS17045328 | 207652176 | CR2   | G            | A            | 0.6030      | 1.183  | 0.5552        | 1.206    |
| 1   | EXM144740      | 207653364 | CR2   | G            | A            | 0.6062      | 0.8743 | 0.4428        | 0.8213   |
| 1   | EXM144473      | 207300070 | C4BPA | A            | G            | 0.6458      | 0.8845 | 0.5855        | 0.8667   |
| 1   | EXM144961      | 207791434 | CR1   | G            | A            | 0.7044      | 1.218  | 0.887         | 1.075    |
| 1   | EXM121964      | 169519112 | F5    | T            | C            | 0.7311      | 1.115  | 0.9299        | 1.027    |

|   |                |           |       |   |   |        |        |        |           |
|---|----------------|-----------|-------|---|---|--------|--------|--------|-----------|
| 1 | EXM144679      | 207646898 | CR2   | C | T | 0.7341 | 0.95   | 0.5762 | 0.9208    |
| 1 | EXM144874      | 207755285 | CR1   | A | G | 0.7434 | 0.7922 | 0.8784 | 1.109     |
| 1 | EXM144675      | 207646462 | CR2   | A | G | 0.7572 | 0.9545 | 0.5927 | 0.9241    |
| 1 | EXM144681      | 207646923 | CR2   | A | G | 0.7579 | 0.9545 | 0.5992 | 0.9254    |
| 1 | EXM133877      | 197026289 | F13B  | G | A | 0.8023 | 0.7329 | 0.7631 | 0.6907    |
| 1 | EXM-RS10737680 | 196679455 | CFH   | C | A | 0.8453 | 1.025  | 0.6321 | 1.062     |
| 1 | EXM-RS1329428  | 196702810 | CFH   | A | G | 0.8453 | 1.025  | 0.6321 | 1.062     |
| 1 | EXM-RS1410996  | 196696933 | CFH   | T | C | 0.8453 | 1.025  | 0.6321 | 1.062     |
| 1 | EXM122075      | 169565346 | F5    | A | C | 0.8731 | 0.9642 | 0.9244 | 0.9793    |
| 1 | EXM121879      | 169511555 | F5    | C | T | 0.8767 | 1.023  | 0.7438 | 0.9545    |
| 1 | EXM121894      | 169511734 | F5    | C | T | 0.8792 | 1.022  | 0.7491 | 0.9556    |
| 1 | EXM121896      | 169511755 | F5    | C | T | 0.9022 | 1.018  | 0.7251 | 0.9513    |
| 1 | EXM144655      | 207644786 | CR2   | A | T | 0.9062 | 0.8651 | 0.7631 | 0.6907    |
| 1 | EXM121743      | 169498975 | F5    | C | T | 0.9359 | 0.9892 | 0.8742 | 0.9793    |
| 1 | EXM133490      | 196712596 | CFH   | T | A | 0.9514 | 0.9559 | 0.7977 | 0.8282    |
| 1 | EXM121985      | 169524517 | F5    | A | G | 0.9666 | 0.9682 | 0.6435 | 1.391     |
| 1 | EXM144888      | 207760773 | CR1   | T | C | 0.9814 | 1.003  | 0.996  | 0.9993    |
| 1 | EXM2259849     | 169527856 | F5    | C | T | 0.9866 | 1.002  | 0.8072 | 1.033     |
| 1 | EXM144899      | 207762095 | CR1   | T | C | 0.9879 | 0.9815 | 0.7631 | 0.6907    |
| 1 | EXM121732      | 169497306 | F5    | A | G | 0.9993 | 9E-10  | 0.9993 | 8.541E-10 |
| 1 | EXM121746      | 169499020 | F5    | C | G | 0.9993 | 1E-09  | 0.9993 | 8.541E-10 |
| 1 | EXM121969      | 169519883 | F5    | A | G | 0.9993 | 3E+09  | 0.9993 | 2.245E+09 |
| 1 | EXM122036      | 169555582 | F5    | T | C | 0.9993 | 8E-10  | 0.9993 | 8.515E-10 |
| 1 | EXM133460      | 196706677 | CFH   | T | G | 0.9993 | 2E+09  | 0.9993 | 2.245E+09 |
| 1 | EXM133479      | 196711067 | CFH   | T | G | 0.9993 | 2E+09  | 0.9993 | 2.245E+09 |
| 1 | EXM133865      | 197024914 | F13B  | G | A | 0.9993 | 2E+09  | 0.9993 | 2.245E+09 |
| 1 | EXM144467      | 207297622 | C4BPA | A | G | 0.9993 | 2E+09  | 0.9993 | 2.245E+09 |
| 1 | EXM144499      | 207307932 | C4BPA | A | G | 0.9993 | 2E+09  | 0.9993 | 2.245E+09 |
| 1 | EXM144639      | 207643432 | CR2   | G | C | 0.9993 | 1E-09  | 0.9993 | 8.541E-10 |

**Supplemental Table 7** Complete unadjusted additive logistic association results for Finnish mothers' Affymetrix 6.0 SNP arrays sorted by p-value. The gene listed is that in which the SNP is located and in parentheses is the VAAST gene the SNP was selected to interrogate within the 10kb 5' and 3' buffer.

| CHR | SNP        | BP        | GENE       | MINOR ALLELE | MAJOR ALLELE | UNADJ P-VALUE | UNADJ OR |
|-----|------------|-----------|------------|--------------|--------------|---------------|----------|
| 1   | rs10429953 | 205855201 | CR1        | G            | A            | 1.31E-04      | 1.931    |
| 1   | rs10429943 | 205856094 | CR1        | T            | C            | 3.74E-04      | 1.841    |
| 1   | rs11118166 | 205848618 | CR1        | G            | A            | 5.78E-04      | 1.776    |
| 1   | rs12567990 | 205748308 | CR1        | T            | C            | 5.82E-04      | 1.791    |
| 1   | rs12141045 | 205838777 | CR1        | G            | A            | 6.22E-04      | 1.776    |
| 1   | rs599948   | 205818862 | CR1        | C            | T            | 7.04E-04      | 1.664    |
| 1   | rs677066   | 205840614 | CR1        | C            | T            | 1.70E-03      | 1.591    |
| 1   | rs3753305  | 167820682 | F5         | G            | C            | 5.52E-03      | 1.422    |
| 1   | rs9943077  | 205361921 | C4BPA      | T            | C            | 0.02323       | 0.7266   |
| 1   | rs2491393  | 205366882 | C4BPA      | G            | A            | 0.03275       | 1.335    |
| 1   | rs10489185 | 167815516 | F5         | A            | C            | 0.03766       | 0.757    |
| 1   | rs12080578 | 205887235 | CR1L (CR1) | G            | A            | 0.04018       | 1.525    |
| 1   | rs17522707 | 167829686 | SELP (F5)  | A            | G            | 0.04466       | 0.5847   |
| 1   | rs4844573  | 205371523 | C4BPA      | C            | T            | 0.05165       | 1.28     |
| 1   | rs2213873  | 167810401 | F5         | A            | G            | 0.05722       | 0.7711   |
| 1   | rs10733086 | 194943558 | CFH        | A            | T            | 0.06023       | 0.7854   |
| 1   | rs2227245  | 167806704 | F5         | T            | C            | 0.06292       | 0.7785   |
| 1   | rs572515   | 194912884 | CFH        | A            | G            | 0.06589       | 0.7914   |
| 1   | rs6691048  | 167808759 | F5         | T            | C            | 0.0678        | 0.7857   |
| 1   | rs4403634  | 205334714 | C4BPA      | A            | C            | 0.06793       | 0.797    |
| 1   | rs6427195  | 167747800 | F5         | T            | A            | 0.07488       | 1.609    |
| 1   | rs12406092 | 167809755 | F5         | T            | C            | 0.07674       | 0.7934   |
| 1   | rs7551623  | 167740978 | F5         | A            | G            | 0.08331       | 0.6452   |
| 1   | rs2491395  | 205368346 | C4BPA      | T            | A            | 0.08607       | 1.264    |
| 1   | rs12032512 | 205719801 | CR2        | C            | G            | 0.09646       | 0.8065   |
| 1   | rs6695321  | 194942484 | CFH        | G            | A            | 0.1016        | 1.239    |
| 1   | rs9332647  | 167758724 | F5         | G            | A            | 0.1105        | 0.6706   |
| 1   | rs11118242 | 205886936 | CR1L (CR1) | T            | C            | 0.1129        | 0.8181   |
| 1   | rs2274566  | 205819968 | CR1        | G            | A            | 0.1181        | 1.227    |
| 1   | rs1018827  | 167780630 | F5         | T            | C            | 0.1195        | 1.501    |
| 1   | rs4618971  | 205732684 | CR1        | C            | T            | 0.1263        | 0.8011   |
| 1   | rs6662176  | 167810667 | F5         | T            | A            | 0.1271        | 0.8195   |
| 1   | rs6427197  | 167767214 | F5         | G            | T            | 0.1272        | 1.484    |
| 1   | rs9429781  | 205733845 | CR1        | G            | T            | 0.1343        | 0.7974   |
| 1   | rs7542088  | 167802864 | F5         | A            | C            | 0.1538        | 0.8256   |
| 1   | rs1329423  | 194913010 | CFH        | G            | A            | 0.1547        | 1.258    |
| 1   | rs17044576 | 205701293 | CR2        | G            | A            | 0.1567        | 1.422    |
| 1   | rs10801555 | 194926884 | CFH        | A            | G            | 0.1568        | 0.8273   |
| 1   | rs514943   | 194930536 | CFH        | G            | A            | 0.1569        | 0.836    |
| 1   | rs6428357  | 194942194 | CFH        | T            | C            | 0.1654        | 0.8365   |

|   |            |           |           |   |   |        |        |
|---|------------|-----------|-----------|---|---|--------|--------|
| 1 | rs11803956 | 205869644 | CR1       | T | C | 0.1693 | 1.187  |
| 1 | rs10779340 | 205883648 | CR1       | C | T | 0.1704 | 1.187  |
| 1 | rs1831282  | 194940616 | CFH       | A | C | 0.1724 | 0.8445 |
| 1 | rs395544   | 194964895 | CFH       | A | G | 0.1894 | 0.8456 |
| 1 | rs2182911  | 205726694 | CR2       | G | A | 0.203  | 0.8308 |
| 1 | rs1759007  | 195294229 | F13B      | T | C | 0.2242 | 0.7253 |
| 1 | rs10801556 | 194927087 | CFH       | T | C | 0.2281 | 0.8539 |
| 1 | rs17258982 | 205719987 | CR2       | C | T | 0.2337 | 0.7363 |
| 1 | rs6690215  | 205722673 | CR2       | C | T | 0.2468 | 0.86   |
| 1 | rs4844597  | 205737892 | CR1       | C | T | 0.2732 | 0.8503 |
| 1 | rs742855   | 194972143 | CFH       | G | A | 0.2843 | 1.212  |
| 1 | rs7518773  | 195278259 | F13B      | A | G | 0.2971 | 1.137  |
| 1 | rs10737680 | 194946078 | CFH       | G | T | 0.2977 | 1.146  |
| 1 | rs974793   | 167745278 | F5        | T | C | 0.2998 | 1.172  |
| 1 | rs203687   | 194940893 | CFH       | C | T | 0.3151 | 0.8774 |
| 1 | rs1759008  | 195293518 | F13B      | T | G | 0.3161 | 0.7802 |
| 1 | rs3917843  | 167826881 | SELP (F5) | T | C | 0.3344 | 0.8381 |
| 1 | rs9332627  | 167764444 | F5        | T | C | 0.3483 | 1.153  |
| 1 | rs3820060  | 167751176 | F5        | G | T | 0.3557 | 1.134  |
| 1 | rs403846   | 194963360 | CFH       | A | G | 0.3581 | 0.8845 |
| 1 | rs1627765  | 195299666 | F13B      | C | T | 0.371  | 0.8008 |
| 1 | rs424535   | 194975846 | CFH       | T | A | 0.3888 | 1.124  |
| 1 | rs10754209 | 195278200 | F13B      | A | T | 0.3949 | 1.111  |
| 1 | rs4915148  | 195302161 | F13B      | T | C | 0.437  | 0.8258 |
| 1 | rs857021   | 195274102 | F13B      | A | G | 0.437  | 0.8258 |
| 1 | rs2182913  | 205727001 | CR2       | T | C | 0.4498 | 0.9044 |
| 1 | rs3849266  | 205819613 | CR1       | T | C | 0.4527 | 1.112  |
| 1 | rs1571344  | 205737551 | CR1       | G | A | 0.4535 | 1.185  |
| 1 | rs3917820  | 167831369 | SELP (F5) | T | C | 0.4566 | 1.172  |
| 1 | rs4656685  | 167750468 | F5        | A | G | 0.4634 | 1.123  |
| 1 | rs1759009  | 195293295 | F13B      | T | C | 0.5075 | 0.847  |
| 1 | rs3766104  | 167755647 | F5        | T | A | 0.5089 | 0.8546 |
| 1 | rs17020993 | 205355015 | C4BPA     | G | A | 0.5116 | 1.145  |
| 1 | rs7519408  | 205727912 | CR2       | C | G | 0.5476 | 0.9042 |
| 1 | rs3917824  | 167831206 | SELP (F5) | G | C | 0.5669 | 1.13   |
| 1 | rs3917819  | 167831513 | SELP (F5) | G | A | 0.598  | 1.13   |
| 1 | rs9332600  | 167779537 | F5        | T | C | 0.6052 | 1.077  |
| 1 | rs8942     | 205336542 | C4BPB     | A | G | 0.6097 | 1.113  |
| 1 | rs6128     | 167829528 | SELP (F5) | A | G | 0.6377 | 0.9326 |
| 1 | rs9332619  | 167766972 | F5        | T | C | 0.6544 | 1.069  |
| 1 | rs9332661  | 167755827 | F5        | C | T | 0.666  | 1.101  |
| 1 | rs6661764  | 205875008 | CR1       | C | G | 0.7046 | 1.05   |
| 1 | rs4524     | 167778379 | F5        | G | A | 0.7397 | 1.049  |
| 1 | rs7527218  | 205690452 | CR2       | C | T | 0.7508 | 1.041  |
| 1 | rs6662593  | 167779218 | F5        | T | C | 0.7594 | 1.045  |
| 1 | rs3766110  | 167781807 | F5        | C | A | 0.7746 | 0.9597 |

|   |            |           |       |   |   |        |        |
|---|------------|-----------|-------|---|---|--------|--------|
| 1 | rs1986158  | 205737367 | CR1   | G | A | 0.7833 | 1.065  |
| 1 | rs6029     | 167796597 | F5    | A | G | 0.7891 | 0.9636 |
| 1 | rs12025910 | 167745405 | F5    | C | T | 0.797  | 1.059  |
| 1 | rs17615    | 205713085 | CR2   | A | G | 0.8337 | 0.9697 |
| 1 | rs9332618  | 167767105 | F5    | T | C | 0.8377 | 0.9661 |
| 1 | rs11120211 | 205343002 | C4BPA | A | G | 0.8424 | 1.054  |
| 1 | rs2019727  | 194941337 | CFH   | T | A | 0.8471 | 1.037  |
| 1 | rs2940253  | 205712366 | CR2   | C | G | 0.8611 | 0.9746 |
| 1 | rs9332595  | 167780979 | F5    | C | G | 0.8669 | 0.9767 |
| 1 | rs11120218 | 205345074 | C4BPA | T | C | 0.8718 | 1.032  |
| 1 | rs9332640  | 167760350 | F5    | G | C | 0.8719 | 0.9804 |
| 1 | rs511678   | 205711905 | CR2   | C | G | 0.8976 | 0.981  |
| 1 | rs1410408  | 205732931 | CR1   | T | C | 0.9113 | 0.9738 |
| 1 | rs311311   | 205706318 | CR2   | C | G | 0.9124 | 0.984  |
| 1 | rs6015     | 167786518 | F5    | T | C | 0.9447 | 1.014  |
| 1 | rs9429774  | 205712518 | CR2   | T | C | 0.9519 | 0.9912 |
| 1 | rs916438   | 167766283 | F5    | A | T | 0.9561 | 0.993  |
